# Supplementary material
Source: Springer Nature journal article supplement (https://www.springermedizin.de/resource/supplementary/12950_2011_214_MOESM6_ESM.pdf/9558212)

A

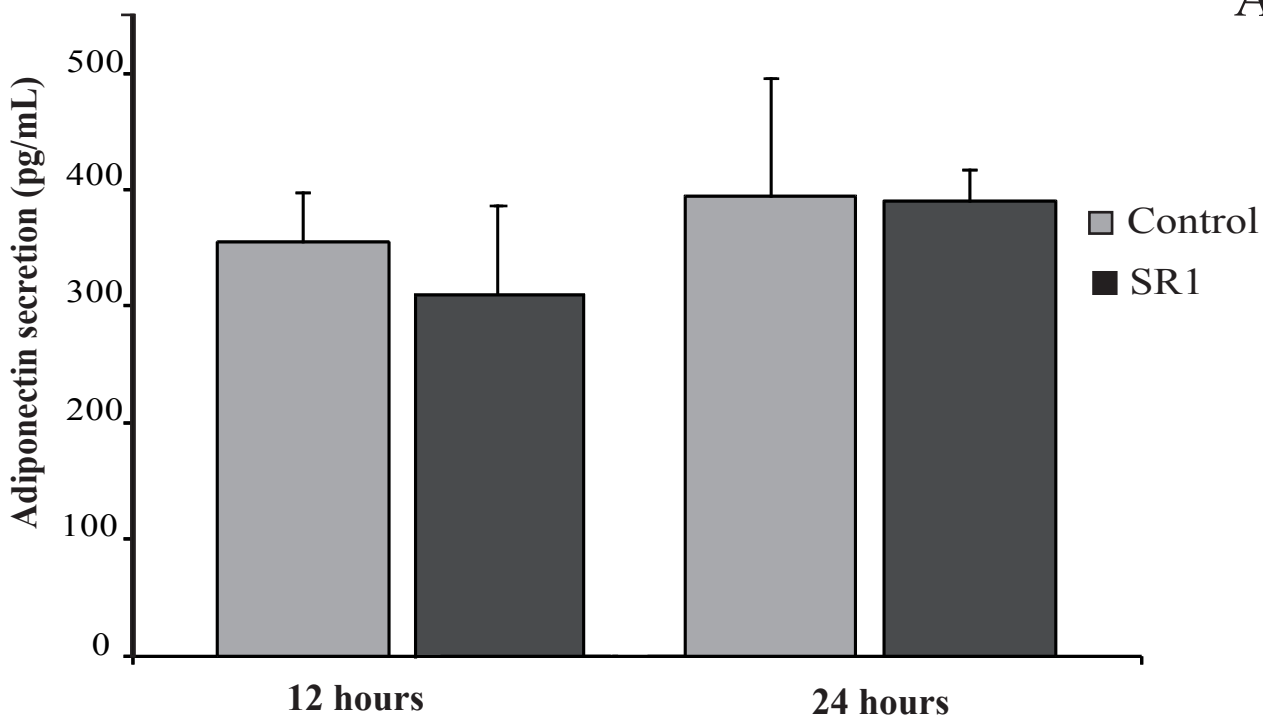

B

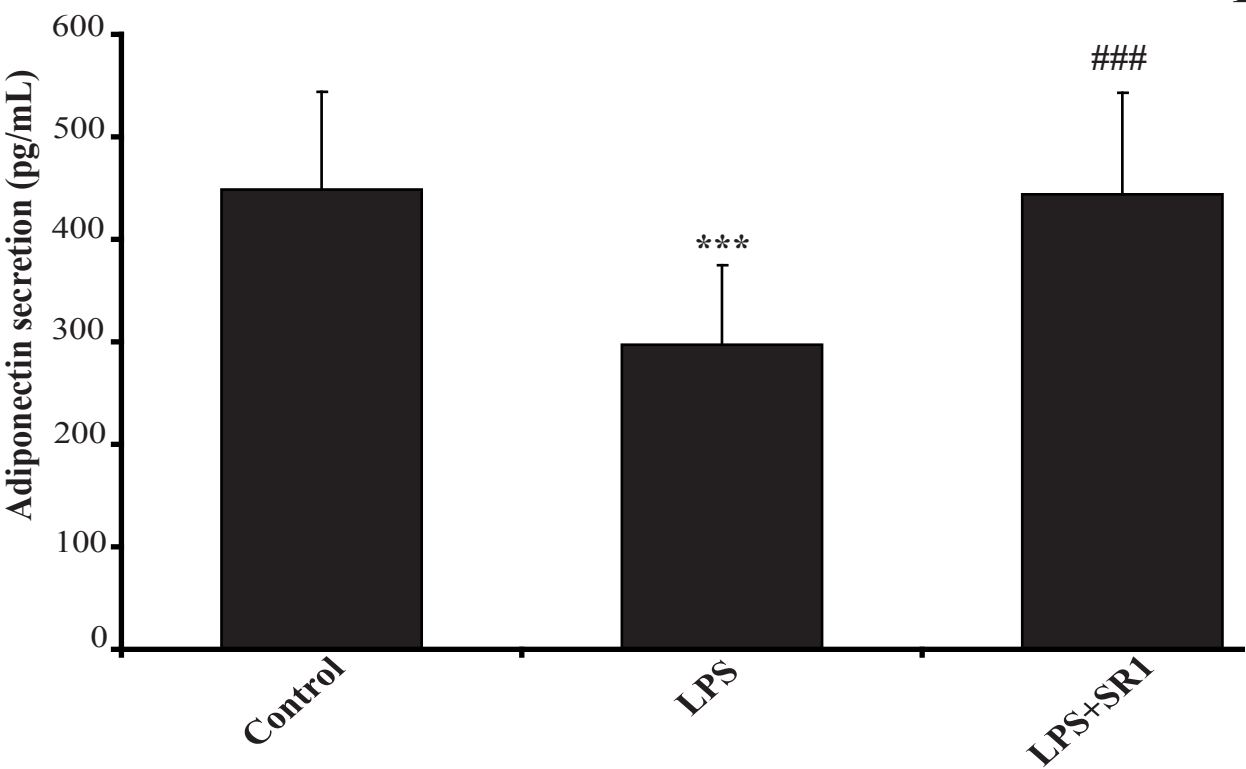

Supplement: MOESM6 [file 9558212]
